# Supplementary material for: Protein-protein interaction as a predictor of subcellular location
Source: PubMed Central journal article supplement (PMC2663780; doi:10.1186/1752-0509-3-28), 2009-02-25
Supplement: 1752-0509-3-28-S1.pdf [file 1752-0509-3-28-S1.pdf]

## Additional file 1 - The number of PPIs according to presence of GO CC for protein and PPI

In heterodimeric PPIs, the two interacting proteins are different. The reference set for this study consists of all PPIs in which a GO CC term is available for each of the two interacting proteins. We identify a further set of PPIs for which one protein in each interacting pair has a GO CC term and the other one does not; this constitutes our potential prediction set. The remaining PPIs have no associated GO CC terms and are not informative for this study.

| PPI sets                      | Human  |                               |                                  | Mouse  |                               |                                  | Fly    |                               |                                  | Yeast  |                               |                                  |
|-------------------------------|--------|-------------------------------|----------------------------------|--------|-------------------------------|----------------------------------|--------|-------------------------------|----------------------------------|--------|-------------------------------|----------------------------------|
|                               | # PPIs | # proteins in PPI set with GO | # proteins in PPI set without GO | # PPIs | # proteins in PPI set with GO | # proteins in PPI set without GO | # PPIs | # proteins in PPI set with GO | # proteins in PPI set without GO | # PPIs | # proteins in PPI set with GO | # proteins in PPI set without GO |
| Total # of heterodimeric PPIs | 19686  | 2494                          | 5399                             | 2753   | 1029                          | 1359                             | 30878  | 782                           | 7996                             | 22635  | 3938                          | 1488                             |
| Reference set                 | 3298   | 1860                          | --                               | 740    | 780                           | --                               | 540    | 461                           | --                               | 16110  | 3837                          | --                               |
| Potential prediction set      | 8830   | 2083                          | 3280                             | 1239   | 587                           | 783                              | 5775   | 716                           | 2998                             | 5727   | 1999                          | 1406                             |
| # of PPIs with no known SCL   | 7558   | --                            | 4364                             | 774    | --                            | 876                              | 24563  | --                            | 7567                             | 798    | --                            | 663                              |
