# Supplementary material for: Protein-protein interaction as a predictor of subcellular location
Source: PubMed Central journal article supplement (PMC2663780; doi:10.1186/1752-0509-3-28), 2009-02-25

## Additional file 2 - Coverage and proportion of PPIs

These data are drawn from the subsets supported by the *BPscore* line of evidence. Panels a-d show the proportion of human, mouse, fly and yeast reference PPIs supported (coverage), and the proportion of co-PPIs, for thresholds from 0.1 to 0.9. Blue circles, coverage; red circles, co-PPIs.

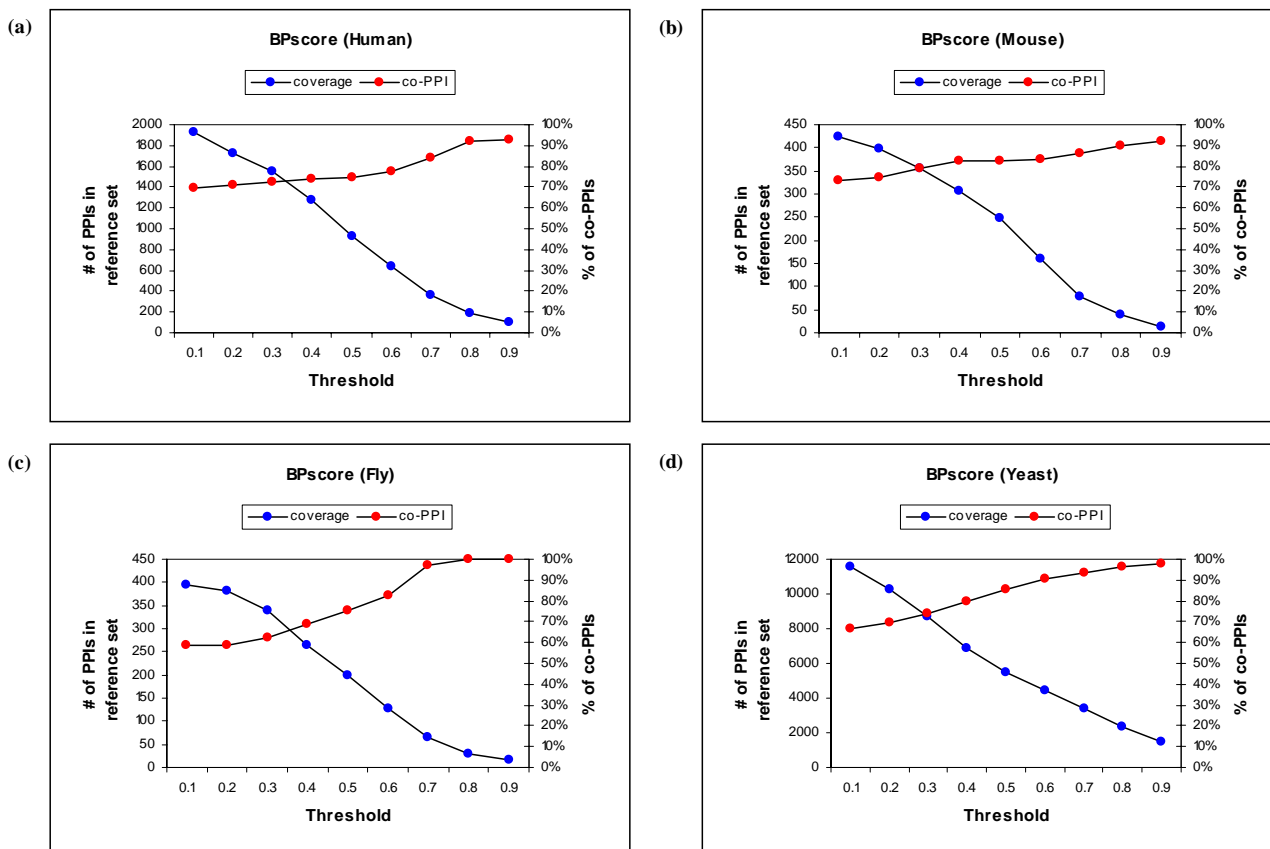

Supplement: 1752-0509-3-28-S2.pdf [file 1752-0509-3-28-S2.pdf]
