# Supplementary material for: Protein-protein interaction as a predictor of subcellular location
Source: PubMed Central journal article supplement (PMC2663780; doi:10.1186/1752-0509-3-28), 2009-02-25
Supplement: 1752-0509-3-28-S3.pdf [file 1752-0509-3-28-S3.pdf]

### Additional file 3 - Comparison of protein SCL between interologs

The SCL of proteins in human PPIs was compared with location of their orthologs from mouse, fly and yeast interologs. Shaded rows indicate cases where these locations differ. PM, plasma membrane; CMV, cytoplasmic membrane bounded-vesicle; ER, endoplasmic reticulum.

| Species | Protein A | Protein B | GO CC                                  | GO CC                                  | Location A             | Location B           | Species | Protein C | Protein D | GO CC                                  | GO CC                                  | Location C                 | Location D                 |
|---------|-----------|-----------|----------------------------------------|----------------------------------------|------------------------|----------------------|---------|-----------|-----------|----------------------------------------|----------------------------------------|----------------------------|----------------------------|
| Human   | P14598    | Q15080    | GO:0005737                             | GO:0005737<br>GO:0005886               | Cytoplasm              | Cytoplasm<br>PM      | Mouse   | P97369    | Q09014    | GO:0005737                             | GO:0005737                             | Cytoplasm                  | Cytoplasm                  |
| Human   | P51636    | Q03135    | GO:0005886<br>GO:0005737<br>GO:0016023 | GO:0005886<br>GO:0005783<br>GO:0005794 | PM<br>Cytoplasm<br>CMV | PM<br>ER<br>Golgi    | Mouse   | P49817    | Q9WVC3    | GO:0005886<br>GO:0005737               | GO:0005886                             | PM<br>Cytoplasm            | PM                         |
| Human   | P01100    | P05412    | GO:0005634                             | GO:0005634                             | Nucleus                | Nucleus              | Mouse   | P01101    | P05627    | GO:0005634                             | GO:0005634                             | Nucleus                    | Nucleus                    |
| Human   | P06400    | P17676    | GO:0005634                             | GO:0005634                             | Nucleus                | Nucleus              | Mouse   | P13405    | P28033    | GO:0005634                             | GO:0005634<br>GO:0005737               | Nucleus                    | Nucleus<br>Cytoplasm       |
| Human   | P49736    | Q13416    | GO:0005634                             | GO:0005634                             | Nucleus                | Nucleus              | Mouse   | P97310    | Q60862    | GO:0005634                             | GO:0005634                             | Nucleus                    | Nucleus                    |
| Human   | P33993    | P49736    | GO:0005634                             | GO:0005634                             | Nucleus                | Nucleus              | Mouse   | P97310    | Q61881    | GO:0005634                             | GO:0005634                             | Nucleus                    | Nucleus                    |
| Human   | Q13415    | Q13416    | GO:0005634                             | GO:0005634                             | Nucleus                | Nucleus              | Mouse   | Q60862    | Q9Z1N2    | GO:0005634                             | GO:0005634                             | Nucleus                    | Nucleus                    |
| Human   | P19838    | Q13547    | GO:0005634<br>GO:0005737               | GO:0005634<br>GO:0005737               | Nucleus<br>Cytoplasm   | Nucleus<br>Cytoplasm | Mouse   | O09106    | P25799    | GO:0005634<br>GO:0005737               | GO:0005634                             | Nucleus<br>Cytoplasm       | Nucleus                    |
| Human   | Q04206    | Q13547    | GO:0005634<br>GO:0005737               | GO:0005634<br>GO:0005737               | Nucleus<br>Cytoplasm   | Nucleus<br>Cytoplasm | Mouse   | O09106    | Q04207    | GO:0005634<br>GO:0005737               | GO:0005634<br>GO:0005737               | Nucleus<br>Cytoplasm       | Nucleus<br>Cytoplasm       |
| Human   | P19838    | Q04206    | GO:0005634<br>GO:0005737               | GO:0005634<br>GO:0005737               | Nucleus<br>Cytoplasm   | Nucleus<br>Cytoplasm | Mouse   | P25799    | Q04207    | GO:0005634                             | GO:0005634<br>GO:0005737               | Nucleus                    | Nucleus<br>Cytoplasm       |
| Human   | P25963    | Q04206    | GO:0005634<br>GO:0005737               | GO:0005634<br>GO:0005737               | Nucleus<br>Cytoplasm   | Nucleus<br>Cytoplasm | Mouse   | Q04207    | Q9Z1E3    | GO:0005634<br>GO:0005737               | GO:0005634<br>GO:0005737               | Nucleus<br>Cytoplasm       | Nucleus<br>Cytoplasm       |
| Human   | Q9UQL6    | Q9Y618    | GO:0005634<br>GO:0005737               | GO:0005634                             | Nucleus<br>Cytoplasm   | Nucleus              | Mouse   | Q9WU42    | Q9Z2V6    | GO:0005634                             | GO:0005634<br>GO:0005737               | Nucleus                    | Nucleus<br>Cytoplasm       |
| Human   | Q07157    | Q16625    | GO:0005886                             | GO:0005886                             | PM                     | PM                   | Mouse   | P39447    | Q61146    | GO:0005886<br>GO:0005634<br>GO:0005737 | GO:0005886                             | PM<br>Nucleus<br>Cytoplasm | PM                         |
| Human   | P33151    | P35222    | GO:0005886                             | GO:0005886<br>GO:0005634               | PM                     | PM<br>Nucleus        | Mouse   | P55284    | Q02248    | GO:0005886                             | GO:0005886<br>GO:0005634<br>GO:0005737 | PM                         | PM<br>Nucleus<br>Cytoplasm |
| Human   | Q13416    | Q99741    | GO:0005634                             | GO:0005634<br>GO:0005737               | Nucleus                | Nucleus<br>Cytoplasm | Mouse   | O89033    | Q60862    | GO:0005737                             | GO:0005634                             | Cytoplasm                  | Nucleus                    |
| Human   | P33993    | Q99741    | GO:0005634                             | GO:0005634<br>GO:0005737               | Nucleus                | Nucleus<br>Cytoplasm | Mouse   | O89033    | Q61881    | GO:0005737                             | GO:0005634                             | Cytoplasm                  | Nucleus                    |
| Human   | Q13415    | Q99741    | GO:0005634                             | GO:0005634<br>GO:0005737               | Nucleus                | Nucleus<br>Cytoplasm | Mouse   | O89033    | Q9Z1N2    | GO:0005737                             | GO:0005634                             | Cytoplasm                  | Nucleus                    |

|       |        |        |                                        |                          |                            |                      |       |        |        |                          |                          |                            |                            |
|-------|--------|--------|----------------------------------------|--------------------------|----------------------------|----------------------|-------|--------|--------|--------------------------|--------------------------|----------------------------|----------------------------|
| Human | P10415 | Q99933 | GO:0005634<br>GO:0005739               | GO:0005634<br>GO:0005737 | Nucleus<br>Mitochondrion   | Nucleus<br>Cytoplasm | Mouse | P10417 | Q60739 | GO:0005737<br>GO:0005739 | GO:0005634<br>GO:0005737 | Cytoplasm<br>Mitochondrion | Nucleus<br>Cytoplasm       |
| Human | P98161 | Q13563 | GO:0005886                             | GO:0005737<br>GO:0005886 | PM                         | Cytoplasm<br>PM      | Mouse | O08852 | O35245 | GO:0005634<br>GO:0005886 | GO:0005783               | Nucleus<br>PM              | ER                         |
| Human | O60563 | P50750 | GO:0005634                             | GO:0005634               | Nucleus                    | Nucleus              | Fly   | O17432 | O96433 | GO:0005634               | GO:0005634               | Nucleus                    | Nucleus                    |
| Human | P11387 | Q9NS56 | GO:0005634                             | GO:0005634               | Nucleus                    | Nucleus              | Fly   | P30189 | Q9V8P9 | GO:0005634<br>GO:0005737 | GO:0005634               | Nucleus<br>Cytoplasm       | Nucleus                    |
| Human | P26368 | Q01081 | GO:0005634                             | GO:0005634               | Nucleus                    | Nucleus              | Fly   | Q24562 | Q94535 | GO:0005634               | GO:0005634               | Nucleus                    | Nucleus                    |
| Human | P25963 | Q04206 | GO:0005737<br>GO:0005634               | GO:0005737<br>GO:0005634 | Cytoplasm<br>Nucleus       | Cytoplasm<br>Nucleus | Fly   | P15330 | Q03017 | GO:0005737<br>GO:0005634 | GO:0005737               | Cytoplasm<br>Nucleus       | Cytoplasm                  |
| Human | Q15528 | Q9NVC6 | GO:0005634<br>GO:0005737               | GO:0005634               | Nucleus<br>Cytoplasm       | Nucleus              | Fly   | Q9V439 | Q9VEC1 | GO:0005634               | GO:0005634               | Nucleus                    | Nucleus                    |
| Human | P25054 | P35222 | GO:0005886<br>GO:0005634<br>GO:0005737 | GO:0005886<br>GO:0005634 | PM<br>Nucleus<br>Cytoplasm | PM<br>Nucleus        | Fly   | P18824 | Q9Y1T2 | GO:0005886<br>GO:0005737 | GO:0005886               | PM<br>Cytoplasm            | PM                         |
| Human | P10071 | Q9UMX1 | GO:0005634<br>GO:0005737               | GO:0005634               | Nucleus<br>Cytoplasm       | Nucleus              | Fly   | P19538 | Q27279 | GO:0005634<br>GO:0005737 | GO:0005737               | Nucleus<br>Cytoplasm       | Cytoplasm                  |
| Human | P05386 | P05387 | GO:0005737                             | GO:0005737               | Cytoplasm                  | Cytoplasm            | Yeast | P02400 | P10622 | GO:0005737               | GO:0005737               | Cytoplasm                  | Cytoplasm                  |
| Human | P11940 | Q04637 | GO:0005737                             | GO:0005737               | Cytoplasm                  | Cytoplasm            | Yeast | P04147 | P39935 | GO:0005737<br>GO:0005634 | GO:0005737<br>GO:0005739 | Cytoplasm<br>Nucleus       | Cytoplasm<br>Mitochondrion |
| Human | O43432 | P11940 | GO:0005737                             | GO:0005737               | Cytoplasm                  | Cytoplasm            | Yeast | P04147 | P39935 | GO:0005737<br>GO:0005634 | GO:0005737<br>GO:0005739 | Cytoplasm<br>Nucleus       | Cytoplasm<br>Mitochondrion |
| Human | P11940 | Q04637 | GO:0005737                             | GO:0005737               | Cytoplasm                  | Cytoplasm            | Yeast | P04147 | P39936 | GO:0005737<br>GO:0005634 | GO:0005737               | Cytoplasm<br>Nucleus       | Cytoplasm                  |
| Human | O43432 | P11940 | GO:0005737                             | GO:0005737               | Cytoplasm                  | Cytoplasm            | Yeast | P04147 | P39936 | GO:0005737<br>GO:0005634 | GO:0005737               | Cytoplasm<br>Nucleus       | Cytoplasm                  |
| Human | P55884 | Q14152 | GO:0005737                             | GO:0005737               | Cytoplasm                  | Cytoplasm            | Yeast | P06103 | P38249 | GO:0005737               | GO:0005737               | Cytoplasm                  | Cytoplasm                  |
| Human | P06730 | Q04637 | GO:0005737                             | GO:0005737               | Cytoplasm                  | Cytoplasm            | Yeast | P07260 | P39935 | GO:0005737<br>GO:0005634 | GO:0005737<br>GO:0005739 | Cytoplasm<br>Nucleus       | Cytoplasm<br>Mitochondrion |
| Human | O43432 | P06730 | GO:0005737                             | GO:0005737               | Cytoplasm                  | Cytoplasm            | Yeast | P07260 | P39935 | GO:0005737<br>GO:0005634 | GO:0005737<br>GO:0005739 | Cytoplasm<br>Nucleus       | Cytoplasm<br>Mitochondrion |
| Human | P06730 | Q04637 | GO:0005737                             | GO:0005737               | Cytoplasm                  | Cytoplasm            | Yeast | P07260 | P39936 | GO:0005737<br>GO:0005634 | GO:0005737               | Cytoplasm<br>Nucleus       | Cytoplasm                  |
| Human | O43432 | P06730 | GO:0005737                             | GO:0005737               | Cytoplasm                  | Cytoplasm            | Yeast | P07260 | P39936 | GO:0005737<br>GO:0005634 | GO:0005737               | Cytoplasm<br>Nucleus       | Cytoplasm                  |
| Human | P08237 | P17858 | GO:0005737                             | GO:0005737               | Cytoplasm                  | Cytoplasm            | Yeast | P16861 | P16862 | GO:0005737<br>GO:0005739 | GO:0005737<br>GO:0005739 | Cytoplasm<br>Mitochondrion | Cytoplasm<br>Mitochondrion |
| Human | P08237 | P17858 | GO:0005737                             | GO:0005737               | Cytoplasm                  | Cytoplasm            | Yeast | P16861 | P16862 | GO:0005737<br>GO:0005739 | GO:0005737<br>GO:0005739 | Cytoplasm<br>Mitochondrion | Cytoplasm<br>Mitochondrion |
| Human | Q99442 | Q9UGP8 | GO:0005783                             | GO:0005783               | ER                         | ER                   | Yeast | P14906 | P21825 | GO:0005783<br>GO:0005739 | GO:0005783               | ER<br>Mitochondrion        | ER                         |
| Human | O43292 | Q969N2 | GO:0005783                             | GO:0005783               | ER                         | ER                   | Yeast | P38875 | P39012 | GO:0005783               | GO:0005783               | ER                         | ER                         |
| Human | Q92643 | Q969N2 | GO:0005783                             | GO:0005783               | ER                         | ER                   | Yeast | P38875 | P49018 | GO:0005783               | GO:0005783               | ER                         | ER                         |

|       |        |        |            |                          |         |                      |       |        |        |                          |                          |                          |                          |
|-------|--------|--------|------------|--------------------------|---------|----------------------|-------|--------|--------|--------------------------|--------------------------|--------------------------|--------------------------|
| Human | O43292 | Q92643 | GO:0005783 | GO:0005783               | ER      | ER                   | Yeast | P39012 | P49018 | GO:0005783               | GO:0005783               | ER                       | ER                       |
| Human | P11387 | P19338 | GO:0005634 | GO:0005634<br>GO:0005737 | Nucleus | Nucleus<br>Cytoplasm | Yeast | P04786 | P27476 | GO:0005634               | GO:0005634<br>GO:0005739 | Nucleus                  | Nucleus<br>Mitochondrion |
| Human | P27694 | P43351 | GO:0005634 | GO:0005634               | Nucleus | Nucleus              | Yeast | P06778 | P22336 | GO:0005634               | GO:0005634<br>GO:0005737 | Nucleus                  | Nucleus<br>Cytoplasm     |
| Human | P15927 | P43351 | GO:0005634 | GO:0005634               | Nucleus | Nucleus              | Yeast | P06778 | P26754 | GO:0005634               | GO:0005634               | Nucleus                  | Nucleus                  |
| Human | P18074 | P19447 | GO:0005634 | GO:0005634               | Nucleus | Nucleus              | Yeast | P06839 | Q00578 | GO:0005634               | GO:0005634               | Nucleus                  | Nucleus                  |
| Human | P49736 | Q99741 | GO:0005634 | GO:0005634<br>GO:0005737 | Nucleus | Nucleus<br>Cytoplasm | Yeast | P09119 | P29469 | GO:0005634               | GO:0005634<br>GO:0005737 | Nucleus                  | Nucleus<br>Cytoplasm     |
| Human | Q13416 | Q99741 | GO:0005634 | GO:0005634<br>GO:0005737 | Nucleus | Nucleus<br>Cytoplasm | Yeast | P09119 | P32833 | GO:0005634               | GO:0005634               | Nucleus                  | Nucleus                  |
| Human | O43913 | Q99741 | GO:0005634 | GO:0005634<br>GO:0005737 | Nucleus | Nucleus<br>Cytoplasm | Yeast | P09119 | P50874 | GO:0005634               | GO:0005634               | Nucleus                  | Nucleus                  |
| Human | P49959 | Q92878 | GO:0005634 | GO:0005634               | Nucleus | Nucleus              | Yeast | P12753 | P32829 | GO:0005634<br>GO:0005739 | GO:0005634<br>GO:0005739 | Nucleus<br>Mitochondrion | Nucleus<br>Mitochondrion |
| Human | P09884 | Q07864 | GO:0005634 | GO:0005634               | Nucleus | Nucleus              | Yeast | P13382 | P21951 | GO:0005634<br>GO:0005739 | GO:0005634               | Nucleus<br>Mitochondrion | Nucleus                  |
| Human | O15514 | P19388 | GO:0005634 | GO:0005634               | Nucleus | Nucleus              | Yeast | P20433 | P20434 | GO:0005634<br>GO:0005737 | GO:0005634               | Nucleus<br>Cytoplasm     | Nucleus                  |
| Human | P18754 | P43487 | GO:0005634 | GO:0005634<br>GO:0005737 | Nucleus | Nucleus<br>Cytoplasm | Yeast | P21827 | P41920 | GO:0005634               | GO:0005634<br>GO:0005737 | Nucleus                  | Nucleus<br>Cytoplasm     |
| Human | P15927 | P27694 | GO:0005634 | GO:0005634               | Nucleus | Nucleus              | Yeast | P22336 | P26754 | GO:0005634<br>GO:0005737 | GO:0005634               | Nucleus<br>Cytoplasm     | Nucleus                  |
| Human | P25205 | P49736 | GO:0005634 | GO:0005634               | Nucleus | Nucleus              | Yeast | P24279 | P29469 | GO:0005634<br>GO:0005737 | GO:0005634<br>GO:0005737 | Nucleus<br>Cytoplasm     | Nucleus<br>Cytoplasm     |
| Human | P25205 | P33992 | GO:0005634 | GO:0005634               | Nucleus | Nucleus              | Yeast | P24279 | P29496 | GO:0005634<br>GO:0005737 | GO:0005634<br>GO:0005737 | Nucleus<br>Cytoplasm     | Nucleus<br>Cytoplasm     |
| Human | P25205 | P33993 | GO:0005634 | GO:0005634               | Nucleus | Nucleus              | Yeast | P24279 | P38132 | GO:0005634<br>GO:0005737 | GO:0005634<br>GO:0005737 | Nucleus<br>Cytoplasm     | Nucleus<br>Cytoplasm     |
| Human | P15927 | P23025 | GO:0005634 | GO:0005634               | Nucleus | Nucleus              | Yeast | P26754 | P28519 | GO:0005634               | GO:0005634               | Nucleus                  | Nucleus                  |
| Human | P33992 | P49736 | GO:0005634 | GO:0005634               | Nucleus | Nucleus              | Yeast | P29469 | P29496 | GO:0005634<br>GO:0005737 | GO:0005634<br>GO:0005737 | Nucleus<br>Cytoplasm     | Nucleus<br>Cytoplasm     |
| Human | P33992 | P33993 | GO:0005634 | GO:0005634               | Nucleus | Nucleus              | Yeast | P29496 | P38132 | GO:0005634<br>GO:0005737 | GO:0005634<br>GO:0005737 | Nucleus<br>Cytoplasm     | Nucleus<br>Cytoplasm     |
| Human | O43913 | Q13416 | GO:0005634 | GO:0005634               | Nucleus | Nucleus              | Yeast | P32833 | P50874 | GO:0005634               | GO:0005634               | Nucleus                  | Nucleus                  |
| Human | O43929 | Q13416 | GO:0005634 | GO:0005634               | Nucleus | Nucleus              | Yeast | P32833 | P54791 | GO:0005634               | GO:0005634               | Nucleus                  | Nucleus                  |
| Human | O14777 | Q14683 | GO:0005634 | GO:0005634               | Nucleus | Nucleus              | Yeast | P32908 | P40460 | GO:0005634               | GO:0005634               | Nucleus                  | Nucleus                  |
| Human | P49848 | Q15542 | GO:0005634 | GO:0005634               | Nucleus | Nucleus              | Yeast | P38129 | P53040 | GO:0005634               | GO:0005634               | Nucleus                  | Nucleus                  |
| Human | O75419 | P33993 | GO:0005634 | GO:0005634               | Nucleus | Nucleus              | Yeast | P38132 | Q08032 | GO:0005634<br>GO:0005737 | GO:0005634               | Nucleus<br>Cytoplasm     | Nucleus                  |
| Human | P35250 | P35251 | GO:0005634 | GO:0005634               | Nucleus | Nucleus              | Yeast | P38630 | P40339 | GO:0005634               | GO:0005634               | Nucleus                  | Nucleus                  |
| Human | O43913 | O43929 | GO:0005634 | GO:0005634               | Nucleus | Nucleus              | Yeast | P50874 | P54791 | GO:0005634               | GO:0005634               | Nucleus                  | Nucleus                  |

|       |        |        |                                        |                          |                                |                      |       |        |        |                                        |                                        |                                  |                                  |
|-------|--------|--------|----------------------------------------|--------------------------|--------------------------------|----------------------|-------|--------|--------|----------------------------------------|----------------------------------------|----------------------------------|----------------------------------|
| Human | Q13435 | Q15393 | GO:0005634                             | GO:0005634               | Nucleus                        | Nucleus              | Yeast | Q02554 | Q04693 | GO:0005634                             | GO:0005634                             | Nucleus                          | Nucleus                          |
| Human | Q13435 | Q15427 | GO:0005634                             | GO:0005634               | Nucleus                        | Nucleus              | Yeast | Q02554 | Q99181 | GO:0005634                             | GO:0005634                             | Nucleus                          | Nucleus                          |
| Human | P55854 | Q8N2W9 | GO:0005634                             | GO:0005634               | Nucleus                        | Nucleus              | Yeast | Q12216 | Q12306 | GO:0005634<br>GO:0005737               | GO:0005634<br>GO:0005737               | Nucleus<br>Cytoplasm             | Nucleus<br>Cytoplasm             |
| Human | P24941 | P25205 | GO:0005634<br>GO:0005737               | GO:0005634               | Nucleus<br>Cytoplasm           | Nucleus              | Yeast | P00546 | P24279 | GO:0005634<br>GO:0005737               | GO:0005634<br>GO:0005737               | Nucleus<br>Cytoplasm             | Nucleus<br>Cytoplasm             |
| Human | P24941 | Q13416 | GO:0005634<br>GO:0005737               | GO:0005634               | Nucleus<br>Cytoplasm           | Nucleus              | Yeast | P00546 | P32833 | GO:0005634<br>GO:0005737               | GO:0005634                             | Nucleus<br>Cytoplasm             | Nucleus                          |
| Human | O00311 | P49736 | GO:0005634<br>GO:0005737               | GO:0005634               | Nucleus<br>Cytoplasm           | Nucleus              | Yeast | P06243 | P29469 | GO:0005634                             | GO:0005634<br>GO:0005737               | Nucleus                          | Nucleus<br>Cytoplasm             |
| Human | O00410 | P49790 | GO:0005634<br>GO:0005737               | GO:0005634               | Nucleus<br>Cytoplasm           | Nucleus              | Yeast | P14907 | P32337 | GO:0005634                             | GO:0005634<br>GO:0005737               | Nucleus                          | Nucleus<br>Cytoplasm             |
| Human | Q15019 | Q9UHD8 | GO:0005737<br>GO:0005634               | GO:0005737               | Cytoplasm<br>Nucleus           | Cytoplasm            | Yeast | P25342 | P32468 | GO:0005737                             | GO:0005737                             | Cytoplasm                        | Cytoplasm                        |
| Human | O14980 | Q9H6Z4 | GO:0005634<br>GO:0005737               | GO:0005634               | Nucleus<br>Cytoplasm           | Nucleus              | Yeast | P30822 | P40517 | GO:0005634                             | GO:0005634                             | Nucleus                          | Nucleus                          |
| Human | Q7L523 | Q9HB90 | GO:0005634<br>GO:0005737               | GO:0005634<br>GO:0005737 | Nucleus<br>Cytoplasm           | Nucleus<br>Cytoplasm | Yeast | P53290 | Q00582 | GO:0005634<br>GO:0005737<br>GO:0005768 | GO:0005634<br>GO:0005737<br>GO:0005768 | Nucleus<br>Cytoplasm<br>Endosome | Nucleus<br>Cytoplasm<br>Endosome |
| Human | Q9Y230 | Q9Y265 | GO:0005634<br>GO:0005737               | GO:0005634               | Nucleus<br>Cytoplasm           | Nucleus              | Yeast | Q03940 | Q12464 | GO:0005634                             | GO:0005634                             | Nucleus                          | Nucleus                          |
| Human | O75381 | Q92968 | GO:0005777                             | GO:0005777               | Peroxisome                     | Peroxisome           | Yeast | P53112 | P80667 | GO:0005777                             | GO:0005777                             | Peroxisome                       | Peroxisome                       |
| Human | P30260 | Q13042 | GO:0005737                             | GO:0005737               | Cytoplasm                      | Cytoplasm            | Yeast | P09798 | P38042 | GO:0005634                             | GO:0005634                             | Nucleus                          | Nucleus                          |
| Human | Q92900 | Q9HAU5 | GO:0005634                             | GO:0005634<br>GO:0005737 | Nucleus                        | Nucleus<br>Cytoplasm | Yeast | P30771 | P38798 | GO:0005737                             | GO:0005737                             | Cytoplasm                        | Cytoplasm                        |
| Human | O15116 | Q9Y4Z0 | GO:0005634                             | GO:0005634               | Nucleus                        | Nucleus              | Yeast | P40070 | P47017 | GO:0005634                             | GO:0005737                             | Nucleus                          | Cytoplasm                        |
| Human | P08107 | P31948 | GO:0005634<br>GO:0005739<br>GO:0005783 | GO:0005634<br>GO:0005794 | Nucleus<br>Mitochondrion<br>ER | Nucleus<br>Golgi     | Yeast | P09435 | P15705 | GO:0005737                             | GO:0005737                             | Cytoplasm                        | Cytoplasm                        |
| Human | P08107 | P31948 | GO:0005634<br>GO:0005739<br>GO:0005783 | GO:0005634<br>GO:0005794 | Nucleus<br>Mitochondrion<br>ER | Nucleus<br>Golgi     | Yeast | P10592 | P15705 | GO:0005737<br>GO:0005739               | GO:0005737                             | Cytoplasm<br>Mitochondrion       | Cytoplasm                        |
| Human | P08107 | P31948 | GO:0005634<br>GO:0005739<br>GO:0005783 | GO:0005634<br>GO:0005794 | Nucleus<br>Mitochondrion<br>ER | Nucleus<br>Golgi     | Yeast | P15705 | P22202 | GO:0005737                             | GO:0005634<br>GO:0005737               | Cytoplasm                        | Nucleus<br>Cytoplasm             |
