# Supplementary material for: Protein-protein interaction as a predictor of subcellular location
Source: PubMed Central journal article supplement (PMC2663780; doi:10.1186/1752-0509-3-28), 2009-02-25
Supplement: 1752-0509-3-28-S4.pdf [file 1752-0509-3-28-S4.pdf]

## Additional file 4 – PPI subsets based on low-throughput experimental data

DB, Method and PMID subsets were generated as described in Methods section 1.4, based on a reference set consisting only of those PPIs detected by low-throughput experimental methods.

| PPI    | Human         |            |            | Mouse         |            |            | Fly           |            |            | Yeast         |            |            |
|--------|---------------|------------|------------|---------------|------------|------------|---------------|------------|------------|---------------|------------|------------|
|        | Total PPI (#) | Co-PPI (#) | Co-PPI (%) | Total PPI (#) | Co-PPI (#) | Co-PPI (%) | Total PPI (#) | Co-PPI (#) | Co-PPI (%) | Total PPI (#) | Co-PPI (#) | Co-PPI (%) |
| DB     | 317<br>(10%)  | 229        | 72%        | 40<br>(5%)    | 36         | 90%        | 4<br>(1%)     | 4          | 100%       | 402<br>(2%)   | 344        | 86%        |
| Method | 98<br>(3%)    | 73         | 74%        | 27<br>(4%)    | 23         | 85%        | 1             | 1          | 100%       | 235<br>(1%)   | 218        | 93%        |
| PMID   | 83<br>(3%)    | 58         | 70%        | 16<br>(2%)    | 13         | 81%        | 7<br>(1%)     | 6          | 86%        | 568<br>(4%)   | 513        | 90%        |
