# Supplementary material for: Protein-protein interaction as a predictor of subcellular location
Source: PubMed Central journal article supplement (PMC2663780; doi:10.1186/1752-0509-3-28), 2009-02-25
Supplement: 1752-0509-3-28-S5.pdf [file 1752-0509-3-28-S5.pdf]

## Additional file 5 – Numbers of PPIs annotated with PSI-MI experimental detection methods

These data are drawn from the subsets supported by the *experimental detection methods* line of evidence, for the four species under consideration.

| <b>Methods</b>                          | <b>Human</b> | <b>Mouse</b> | <b>Fly</b> | <b>Yeast</b> |
|-----------------------------------------|--------------|--------------|------------|--------------|
| Biochemical assay (MI:0401)             | 364          | 109          | 25         | 2857         |
| Protein complementation assay (MI:0090) | 304          | 101          | 20         | 636          |
| Imaging techniques (MI:0428)            | 67           | 26           | 7          | 16           |
| Biophysical assay (MI:0013)             | 48           | 5            | 3          | 82           |
| Others                                  | 39           | --           | --         | 2252         |
