# Supplementary material for: Protein-protein interaction as a predictor of subcellular location
Source: PubMed Central journal article supplement (PMC2663780; doi:10.1186/1752-0509-3-28), 2009-02-25
Supplement: 1752-0509-3-28-S6.pdf [file 1752-0509-3-28-S6.pdf]

**Additional file 6 - Evaluation of prediction method variants on reference and supported subsets for human, mouse, fly and yeast**

The permissive accuracy (PA) and strict accuracy (SA) were calculated for all variants (DISCRETE, MERGED, COMMON and MAJORITY) for all interactions, and for interactions involving an integral membrane protein (M).

| Human<br>PPI sets | DISCRETE |      |        |        | MERGED |      |        |        | COMMON |      |        |        | MAJORITY |      |        |        |
|-------------------|----------|------|--------|--------|--------|------|--------|--------|--------|------|--------|--------|----------|------|--------|--------|
|                   | PA       | SA   | PA (M) | SA (M) | PA     | SA   | PA (M) | SA (M) | PA     | SA   | PA (M) | SA (M) | PA       | SA   | PA (M) | SA (M) |
| Reference         | 0.64     | 0.35 | 0.50   | 0.27   | 0.72   | 0.26 | 0.62   | 0.23   | 0.65   | 0.40 | 0.53   | 0.32   | 0.68     | 0.34 | 0.58   | 0.27   |
| BPscore           | 0.84     | 0.56 | 0.76   | 0.46   | 0.86   | 0.55 | 0.79   | 0.42   | 0.85   | 0.57 | 0.77   | 0.47   | 0.86     | 0.55 | 0.79   | 0.43   |
| Interologs        | 0.85     | 0.58 | 0.70   | 0.46   | 0.84   | 0.54 | 0.69   | 0.42   | 0.83   | 0.57 | 0.67   | 0.45   | 0.84     | 0.56 | 0.69   | 0.45   |
| DDI               | 0.72     | 0.46 | 0.65   | 0.43   | 0.75   | 0.43 | 0.70   | 0.42   | 0.72   | 0.48 | 0.66   | 0.49   | 0.74     | 0.45 | 0.69   | 0.44   |
| PMID              | 0.76     | 0.46 | 0.60   | 0.28   | 0.76   | 0.42 | 0.60   | 0.27   | 0.74   | 0.45 | 0.56   | 0.30   | 0.76     | 0.43 | 0.59   | 0.28   |
| Method            | 0.74     | 0.38 | 0.61   | 0.29   | 0.76   | 0.37 | 0.63   | 0.27   | 0.73   | 0.41 | 0.58   | 0.32   | 0.75     | 0.38 | 0.62   | 0.29   |
| DB                | 0.73     | 0.37 | 0.53   | 0.25   | 0.74   | 0.35 | 0.61   | 0.26   | 0.71   | 0.40 | 0.57   | 0.30   | 0.73     | 0.37 | 0.59   | 0.28   |
| ALL               | 0.74     | 0.42 | 0.61   | 0.35   | 0.78   | 0.38 | 0.69   | 0.33   | 0.74   | 0.45 | 0.64   | 0.40   | 0.76     | 0.41 | 0.67   | 0.36   |
| BIO               | 0.77     | 0.49 | 0.67   | 0.43   | 0.79   | 0.45 | 0.71   | 0.38   | 0.77   | 0.50 | 0.67   | 0.45   | 0.78     | 0.47 | 0.70   | 0.41   |
| EVI               | 0.74     | 0.37 | 0.55   | 0.25   | 0.75   | 0.34 | 0.62   | 0.25   | 0.71   | 0.41 | 0.57   | 0.30   | 0.74     | 0.37 | 0.61   | 0.27   |

| Mouse<br>PPI sets | DISCRETE |      |        |        | MERGED |      |        |        | COMMON |      |        |        | MAJORITY |      |        |        |
|-------------------|----------|------|--------|--------|--------|------|--------|--------|--------|------|--------|--------|----------|------|--------|--------|
|                   | PA       | SA   | PA (M) | SA (M) | PA     | SA   | PA (M) | SA (M) | PA     | SA   | PA (M) | SA (M) | PA       | SA   | PA (M) | SA (M) |
| Reference         | 0.69     | 0.34 | 0.57   | 0.23   | 0.74   | 0.31 | 0.64   | 0.20   | 0.72   | 0.36 | 0.63   | 0.25   | 0.73     | 0.33 | 0.63   | 0.22   |
| BPscore           | 0.86     | 0.56 | 0.73   | 0.25   | 0.86   | 0.53 | 0.72   | 0.19   | 0.86   | 0.54 | 0.71   | 0.22   | 0.86     | 0.54 | 0.72   | 0.22   |
| Interologs        | 0.77     | 0.42 | 0.60   | 0.20   | 0.79   | 0.41 | 0.60   | 0.16   | 0.78   | 0.43 | 0.59   | 0.20   | 0.79     | 0.43 | 0.60   | 0.20   |
| DDI               | 0.82     | 0.40 | 0.75   | 0.33   | 0.83   | 0.36 | 0.77   | 0.26   | 0.82   | 0.38 | 0.77   | 0.29   | 0.82     | 0.37 | 0.77   | 0.27   |
| PMID              | 0.82     | 0.43 | 0.81   | 0.34   | 0.83   | 0.40 | 0.81   | 0.24   | 0.82   | 0.42 | 0.81   | 0.31   | 0.82     | 0.41 | 0.81   | 0.31   |
| Method            | 0.68     | 0.37 | 0.52   | 0.20   | 0.71   | 0.34 | 0.62   | 0.19   | 0.71   | 0.39 | 0.62   | 0.27   | 0.70     | 0.36 | 0.59   | 0.23   |
| DB                | 0.78     | 0.43 | 0.79   | 0.46   | 0.82   | 0.40 | 0.82   | 0.39   | 0.82   | 0.44 | 0.81   | 0.46   | 0.82     | 0.41 | 0.82   | 0.42   |
| ALL               | 0.77     | 0.41 | 0.68   | 0.30   | 0.80   | 0.37 | 0.73   | 0.23   | 0.79   | 0.41 | 0.72   | 0.30   | 0.79     | 0.38 | 0.72   | 0.26   |
| BIO               | 0.82     | 0.45 | 0.72   | 0.30   | 0.83   | 0.42 | 0.73   | 0.23   | 0.82   | 0.45 | 0.72   | 0.27   | 0.83     | 0.43 | 0.73   | 0.25   |
| EVI               | 0.75     | 0.38 | 0.71   | 0.33   | 0.78   | 0.35 | 0.78   | 0.29   | 0.77   | 0.40 | 0.79   | 0.37   | 0.77     | 0.37 | 0.77   | 0.33   |

| Fly        | DISCRETE |      |        |        | MERGED |      |        |        | COMMON |      |        |        | MAJORITY |      |        |        |
|------------|----------|------|--------|--------|--------|------|--------|--------|--------|------|--------|--------|----------|------|--------|--------|
|            | PA       | SA   | PA (M) | SA (M) | PA     | SA   | PA (M) | SA (M) | PA     | SA   | PA (M) | SA (M) | PA       | SA   | PA (M) | SA (M) |
| Reference  | 0.57     | 0.32 | 0.50   | 0.22   | 0.65   | 0.28 | 0.61   | 0.20   | 0.61   | 0.38 | 0.59   | 0.30   | 0.62     | 0.32 | 0.58   | 0.23   |
| BPscore    | 0.97     | 0.65 | 0.78   | 0.21   | 0.98   | 0.63 | 0.80   | 0.20   | 0.98   | 0.68 | 0.79   | 0.30   | 0.98     | 0.64 | 0.80   | 0.20   |
| Interologs | 0.91     | 0.64 | -      | -      | 0.91   | 0.62 | -      | -      | 0.91   | 0.65 | -      | -      | 0.91     | 0.62 | -      | -      |
| DDI        | 0.94     | 0.65 | 0.89   | 0.39   | 0.95   | 0.62 | 0.93   | 0.40   | 0.94   | 0.66 | 0.87   | 0.40   | 0.95     | 0.65 | 0.93   | 0.40   |
| PMID       | 0.91     | 0.57 | 0.76   | 0.12   | 0.93   | 0.51 | 0.85   | 0.06   | 0.92   | 0.60 | 0.75   | 0.17   | 0.93     | 0.56 | 0.85   | 0.06   |
| Method     | 0.89     | 0.48 | 0.34   | -      | 0.88   | 0.41 | 0.34   | -      | 0.86   | 0.48 | 0.34   | -      | 0.88     | 0.45 | 0.34   | -      |
| DB         | 0.47     | 0.27 | 0.29   | 0.21   | 0.56   | 0.27 | 0.39   | 0.28   | 0.51   | 0.33 | 0.38   | 0.35   | 0.53     | 0.29 | 0.35   | 0.29   |
| ALL        | 0.56     | 0.32 | 0.41   | 0.18   | 0.65   | 0.30 | 0.53   | 0.21   | 0.61   | 0.38 | 0.52   | 0.27   | 0.62     | 0.33 | 0.49   | 0.21   |
| BIO        | 0.93     | 0.60 | 0.75   | 0.20   | 0.95   | 0.57 | 0.85   | 0.21   | 0.94   | 0.63 | 0.84   | 0.28   | 0.94     | 0.60 | 0.82   | 0.21   |
| EVI        | 0.51     | 0.28 | 0.33   | 0.17   | 0.60   | 0.27 | 0.43   | 0.20   | 0.55   | 0.34 | 0.42   | 0.25   | 0.57     | 0.30 | 0.40   | 0.20   |

| Yeast      | DISCRETE |      |        |        | MERGED |      |        |        | COMMON |      |        |        | MAJORITY |      |        |        |
|------------|----------|------|--------|--------|--------|------|--------|--------|--------|------|--------|--------|----------|------|--------|--------|
|            | PA       | SA   | PA (M) | SA (M) | PA     | SA   | PA (M) | SA (M) | PA     | SA   | PA (M) | SA (M) | PA       | SA   | PA (M) | SA (M) |
| Reference  | 0.60     | 0.34 | 0.45   | 0.23   | 0.77   | 0.15 | 0.58   | 0.10   | 0.59   | 0.36 | 0.36   | 0.23   | 0.67     | 0.35 | 0.46   | 0.23   |
| BPscore    | 0.94     | 0.69 | 0.89   | 0.58   | 0.95   | 0.53 | 0.92   | 0.50   | 0.94   | 0.69 | 0.91   | 0.65   | 0.94     | 0.65 | 0.91   | 0.59   |
| Interologs | 0.91     | 0.61 | 1.00   | 0.71   | 0.93   | 0.60 | 1.00   | 0.71   | 0.93   | 0.63 | 1.00   | 0.71   | 0.93     | 0.61 | 1.00   | 0.71   |
| DDI        | 0.83     | 0.56 | 0.84   | 0.56   | 0.89   | 0.51 | 0.91   | 0.53   | 0.88   | 0.60 | 0.87   | 0.60   | 0.88     | 0.55 | 0.90   | 0.57   |
| PMID       | 0.86     | 0.58 | 0.84   | 0.55   | 0.90   | 0.50 | 0.86   | 0.46   | 0.89   | 0.62 | 0.86   | 0.55   | 0.89     | 0.57 | 0.86   | 0.52   |
| Method     | 0.81     | 0.53 | 0.63   | 0.35   | 0.87   | 0.36 | 0.68   | 0.23   | 0.84   | 0.55 | 0.65   | 0.34   | 0.84     | 0.49 | 0.64   | 0.31   |
| DB         | 0.62     | 0.36 | 0.43   | 0.22   | 0.74   | 0.19 | 0.48   | 0.13   | 0.60   | 0.36 | 0.36   | 0.20   | 0.67     | 0.34 | 0.42   | 0.18   |
| ALL        | 0.66     | 0.40 | 0.51   | 0.29   | 0.77   | 0.21 | 0.56   | 0.17   | 0.64   | 0.40 | 0.44   | 0.28   | 0.71     | 0.39 | 0.50   | 0.25   |
| BIO        | 0.92     | 0.66 | 0.88   | 0.57   | 0.94   | 0.50 | 0.92   | 0.50   | 0.93   | 0.67 | 0.90   | 0.64   | 0.93     | 0.62 | 0.90   | 0.58   |
| EVI        | 0.63     | 0.37 | 0.44   | 0.23   | 0.75   | 0.20 | 0.49   | 0.14   | 0.61   | 0.37 | 0.37   | 0.21   | 0.67     | 0.35 | 0.43   | 0.19   |

ALL: Union of all subsets (BPscore  $\cup$  Interologs  $\cup$  DDI  $\cup$  PMID  $\cup$  Method  $\cup$  DB)

BIO: Union of sequence-feature-based subsets (BPscore  $\cup$  Interologs  $\cup$  DDI)

EVI: Union of PPI detection processes based subsets (PMID  $\cup$  Method  $\cup$  DB)

M: Interactions involving an integral membrane protein
