# Supplementary material for: Protein-protein interaction as a predictor of subcellular location
Source: PubMed Central journal article supplement (PMC2663780; doi:10.1186/1752-0509-3-28), 2009-02-25
Supplement: 1752-0509-3-28-S7.pdf [file 1752-0509-3-28-S7.pdf]

## Additional file 7 - Interactions between Type I integral membrane proteins and soluble intracellular proteins in human

In this table, protein\_1 represents the integral membrane protein partner and protein\_2 the soluble protein partner. TM indicates the trans-membrane region (residue numbers) predicted for protein\_1. Pfam\_1 and Pfam\_2 represent the domains annotated in UniProt for protein\_1 and protein\_2 respectively; only domains present as interacting pairs in the iPfam subset are included. Pfam residues\_1 and \_2 indicate the location of these domains in the two protein sequences. Location\_1 and \_2 represent the SCL of the two proteins as annotated in UniProt. Interacting proteins are considered to represent an adjacent PPI if the topology of the integral membrane protein places the interacting domain in the same compartment as the soluble protein. The “?” indicates that the topology of the relationship cannot be definitively resolved based on the annotated SCL. Cyt, cytoplasm; End, endosome; ExR, extracellular region; Gol, Golgi apparatus; Nuc, nucleus; PM, plasma membrane.

| Protein_1 | Protein_2 | TM_1    | Pfam_1  | Pfam residues_1 | Pfam_2                    | Pfam residues_2          | Location_1 | Location_2 | Adjacency    |
|-----------|-----------|---------|---------|-----------------|---------------------------|--------------------------|------------|------------|--------------|
| P06213    | O14544    | 957-979 | PF07714 | 1023-1290       | PF00017                   | 384-461                  | PM         | Cyt        | adjacent PPI |
| Q16288    | O60880    | 434-453 | PF07714 | 538-824         | PF00017                   | 7-87                     | PM         | Cyt        | adjacent PPI |
| P04629    | O60880    | 419-439 | PF07714 | 510-781         | PF00017                   | 7-87                     | PM         | Cyt        | adjacent PPI |
| Q16620    | O60880    | 433-454 | PF07714 | 538-807         | PF00017                   | 7-87                     | PM         | Cyt        | adjacent PPI |
| P14778    | P01583    | 341-359 | PF00047 | 43-98           | PF00340                   | 135-266                  | PM         | ExR        | adjacent PPI |
| P14778    | P01584    | 341-359 | PF00047 | 43-98           | PF00340                   | 126-264                  | PM         | ExR        | adjacent PPI |
| P04629    | P62993    | 419-439 | PF07714 | 510-781         | PF00017, PF00018          | 60-135, 159-213          | PM         | Cyt        | adjacent PPI |
| P06213    | P29353    | 957-979 | PF07714 | 1023-1290       | PF00017                   | 488-559                  | PM         | PM         | ?            |
| P06213    | Q13322    | 957-979 | PF07714 | 1023-1290       | PF08947, PF00017          | 423-472, 493-574         | PM         | Cyt, PM    | adjacent PPI |
| P06213    | P41240    | 957-979 | PF07714 | 1023-1290       | PF00017, PF00018, PF07714 | 82-156, 25-173, 195-440  | PM         | Cyt, PM    | adjacent PPI |
| P30530    | P06239    | 445-465 | PF07714 | 529-796         | PF00018, PF00017, PF07714 | 64-119, 127-209, 245-494 | PM         | Cyt, PM    | adjacent PPI |
| Q02763    | P06239    | 746-770 | PF07714 | 824-1092        | PF00018, PF00017, PF07714 | 64-119, 127-209, 245-494 | PM         | Cyt, PM    | adjacent PPI |
| P07766    | P06239    | 128-150 | PF02189 | 185-205         | PF00017                   | 127-209                  | PM         | Cyt, PM    | adjacent PPI |
| P07333    | P62993    | 515-537 | PF07714 | 582-910         | PF00017, PF00018          | 60-135, 159-213          | PM         | Cyt        | adjacent PPI |
| P07766    | P43405    |         | PF02189 | 185-205         | PF00017                   | 168-244                  | PM         | PM         | ?            |
| P07766    | P43403    | 128-150 | PF02189 | 185-205         | PF00017                   | 163-239                  | PM         | Cyt, PM    | adjacent PPI |
| P07766    | P29353    | 128-150 | PF02189 | 185-205         | PF00017                   | 488-559                  | PM         | PM         | ?            |

|        |        |           |                     |                 |                              |                        |         |          |              |
|--------|--------|-----------|---------------------|-----------------|------------------------------|------------------------|---------|----------|--------------|
| P08581 | P62993 | 934-953   | PF07714             | 1078-1337       | PF00017, PF00018             | 60-135, 159-213        | PM      | Cyt      | adjacent PPI |
| P08581 | P40763 | 934-953   | PF07714             | 1078-1337       | PF00017                      | 584-674                | PM      | Nuc, Cyt | adjacent PPI |
| P08581 | P29353 | 934-953   | PF07714             | 1078-1337       | PF00017                      | 488-559                | PM      | PM       | ?            |
| P22455 | P09038 | 373-389   | PF00047,<br>PF07679 | 65-103, 153-241 | PF00167                      | 28-149                 | PM      | ExR      | adjacent PPI |
| P11362 | P09038 | 376-396   | PF00047,<br>PF07679 | 48-103, 255-358 | PF00167                      | 28-149                 | PM      | ExR      | adjacent PPI |
| P22607 | P09038 | 374-395   | PF00047,<br>PF07679 | 54-111, 157-245 | PF00167                      | 28-149                 | PM      | ExR      | adjacent PPI |
| P33151 | P14923 | 597-620   | PF01049             | 621-777         | PF02985, PF00514             | 137-173, 613-653       | PM      | Cyt      | adjacent PPI |
| P16234 | P46108 | 525-548   | PF07714             | 593-950         | PF00017, PF00018             | 13-104, 135-190        | PM      | Nuc, Cyt | adjacent PPI |
| P17948 | P29353 | 764-778   | PF07714             | 827-1154        | PF00017                      | 488-559                | ExR, PM | PM       | ?            |
| P18433 | P62993 | 143-166   | PF00102             | 558-790         | PF00017                      | 60-135                 | PM      | Cyt      | adjacent PPI |
| P20645 | Q9NZ52 | 186-210   | PF02157             | 1-277           | PF00790                      | 3-142                  | End, PM | Gol      | ?            |
| P20645 | Q9UJY5 | 186-210   | PF02157             | 1-277           | PF00790                      | 5-143                  | End, PM | Gol      | ?            |
| P21860 | P29353 | 642-665   | PF07714             | 709-965         | PF00017                      | 488-559                | PM      | PM       | ?            |
| P22607 | P62993 | 374-395   | PF07714             | 472-748         | PF00017, PF00018             | 60-135, 159-213        | PM      | Cyt      | adjacent PPI |
| P29317 | P62993 | 536-556   | PF07714             | 613-871         | PF00017, PF00018             | 60-135, 159-213        | PM      | Cyt      | adjacent PPI |
| P29317 | P29353 | 536-556   | PF07714             | 613-871         | PF00017                      | 488-559                | PM      | PM       | ?            |
| P29320 | P46108 | 542-565   | PF07714             | 621-878         | PF00017, PF00018             | 13-104, 135-190        | PM      | Nuc, Cyt | adjacent PPI |
| Q9UM73 | P29353 | 1036-1056 | PF07714             | 1116-1383       | PF00017                      | 488-559                | PM      | PM       | ?            |
| P35968 | P29353 | 765-786   | PF07714             | 834-1160        | PF00017                      | 488-559                | PM      | PM       | ?            |
| Q16288 | P29353 | 434-453   | PF07714             | 538-824         | PF00017                      | 488-559                | PM      | PM       | ?            |
| Q16832 | P29353 | 400-421   | PF07714             | 563-849         | PF00017                      | 488-559                | PM      | PM       | ?            |
| P30530 | P62993 | 445-465   | PF07714             | 529-796         | PF00017, PF00018             | 60-135, 159-213        | PM      | Cyt      | adjacent PPI |
| P30530 | P41240 | 445-465   | PF07714             | 529-796         | PF00018, PF00017,<br>PF07714 | 12-68, 82-156, 195-440 | PM      | Cyt, PM  | adjacent PPI |
| P33151 | P35222 | 597-620   | PF01049             | 621-777         | PF02985, PF00514             | 146-182, 624-664       | PM      | Nuc, PM  | ?            |
| P33151 | Q99569 | 597-620   | PF01049             | 621-777         | PF00514                      | 814-855                | PM      | PM       | ?            |
| P55291 | P35222 | 595-626   | PF01049             | 629-783         | PF02985, PF00514             | 146-182, 624-664       | PM      | Nuc, PM  | ?            |
| Q86UP0 | P35222 | 638-661   | PF01049             | 663-814         | PF02985, PF00514             | 146-182, 624-664       | PM      | Nuc, PM  | ?            |
| P35916 | P62993 | 776-798   | PF07714             | 845-1169        | PF00017, PF00018             | 60-135, 159-213        | PM      | Cyt      | adjacent PPI |

|        |        |         |         |           |                              |                                    |              |          |              |
|--------|--------|---------|---------|-----------|------------------------------|------------------------------------|--------------|----------|--------------|
| P35968 | P62993 | 765-786 | PF07714 | 834-1160  | PF00017, PF00018             | 60-135, 159-213                    | PM           | Cyt      | adjacent PPI |
| P35968 | Q13322 | 765-786 | PF07714 | 834-1160  | PF08947, PF00017             | 423-472, 493-574                   | PM           | Cyt, PM  | adjacent PPI |
| P54753 | P46108 | 562-581 | PF07714 | 633-892   | PF00017, PF00018             | 13-104, 135-190                    | PM           | Nuc, Cyt | adjacent PPI |
| Q14118 | P46939 | 754-775 | PF05454 | 42-895    | PF00397, PF09068,<br>PF09069 | 2814-2843, 2844-2964,<br>2968-3059 | ExR, PM, ExM | PM       | ?            |
| Q13873 | P53667 | 153-171 | PF00069 | 203-501   | PF00069                      | 339-539                            | PM           | Cyt      | adjacent PPI |
| P54762 | P62993 | 545-561 | PF07714 | 619-878   | PF00017, PF00018             | 60-135, 159-213                    | PM           | Cyt      | adjacent PPI |
| P54762 | Q13322 | 545-561 | PF07714 | 619-878   | PF08947, PF00017             | 423-472, 493-574                   | PM           | Cyt, PM  | adjacent PPI |
| Q04912 | P62993 | 958-978 | PF07714 | 1082-1341 | PF00017, PF00018             | 60-135, 159-213                    | PM           | Cyt      | adjacent PPI |
| Q02763 | P62993 | 746-770 | PF07714 | 824-1092  | PF00017, PF00018             | 60-135, 159-213                    | PM           | Cyt      | adjacent PPI |
| Q12866 | P62993 | 502-524 | PF07714 | 587-854   | PF00017, PF00018             | 60-135, 159-213                    | PM           | Cyt      | adjacent PPI |
| Q15303 | P78352 | 653-675 | PF07714 | 718-974   | PF00018                      | 431-475                            | PM           | Cyt      | adjacent PPI |
| Q15303 | Q12959 | 653-675 | PF07714 | 718-974   | PF00018                      | 584-627                            | PM           | PM       | ?            |
| Q9HB29 | Q14116 | 337-355 | PF00047 | 35-97     | PF00340                      | 56-185                             | PM           | ExR      | adjacent PPI |
| Q14118 | Q96QZ7 | 754-775 | PF05454 | 42-895    | PF00397                      | 361-390                            | ExR, PM, ExM | PM       | ?            |
| Q15303 | Q15700 | 653-675 | PF07714 | 718-974   | PF00018                      | 539-583                            | PM           | PM       | ?            |
