# Supplementary material for: Protein-protein interaction as a predictor of subcellular location
Source: PubMed Central journal article supplement (PMC2663780; doi:10.1186/1752-0509-3-28), 2009-02-25
Supplement: 1752-0509-3-28-S8.pdf [file 1752-0509-3-28-S8.pdf]

## Additional file 8.1 – Evaluation of prediction method variants using human REF set

| PPI sets                                | COMMON | MAJORITY | MERGED | Proteome Analyst | WolfP SORT | CELLO | pTARGET |
|-----------------------------------------|--------|----------|--------|------------------|------------|-------|---------|
| <b>Membrane-membrane PPI only (256)</b> |        |          |        |                  |            |       |         |
| Total # of predicted proteins           | 226    | 256      | 256    | 55               | 256        | 256   | 120     |
| # of correctly predicted proteins in PA | 172    | 195      | 199    | 29               | 137        | 140   | 66      |
| # of correctly predicted proteins in SA | 133    | 129      | 116    | 12               | 102        | 84    | 51      |
| PA                                      | 0.76   | 0.76     | 0.78   | 0.53             | 0.54       | 0.55  | 0.55    |
| SA                                      | 0.59   | 0.50     | 0.45   | 0.22             | 0.40       | 0.33  | 0.43    |
| <b>Soluble-soluble PPI only (1280)</b>  |        |          |        |                  |            |       |         |
| Total # of predicted proteins           | 864    | 1253     | 1280   | 660              | 1279       | 1278  | 819     |
| # of correctly predicted proteins in PA | 632    | 951      | 1032   | 534              | 780        | 919   | 468     |
| # of correctly predicted proteins in SA | 409    | 501      | 341    | 345              | 514        | 565   | 309     |
| PA                                      | 0.73   | 0.76     | 0.81   | 0.81             | 0.61       | 0.72  | 0.57    |
| SA                                      | 0.47   | 0.40     | 0.27   | 0.52             | 0.40       | 0.44  | 0.38    |
| <b>Membrane-soluble PPI only (491)</b>  |        |          |        |                  |            |       |         |
| Total # of predicted proteins           | 298    | 319      | 322    | 85               | 322        | 322   | 150     |
| # of correctly predicted proteins in PA | 85     | 119      | 133    | 63               | 190        | 203   | 84      |
| # of correctly predicted proteins in SA | 36     | 32       | 33     | 40               | 143        | 130   | 64      |
| PA                                      | 0.29   | 0.37     | 0.41   | 0.74             | 0.59       | 0.63  | 0.56    |
| SA                                      | 0.12   | 0.10     | 0.10   | 0.47             | 0.44       | 0.40  | 0.43    |
| <b>Total (1858)</b>                     |        |          |        |                  |            |       |         |
| Total # of predicted proteins           | 1388   | 1828     | 1858   | 800              | 1857       | 1856  | 1089    |
| # of correctly predicted proteins in PA | 889    | 1265     | 1364   | 626              | 1107       | 1262  | 618     |
| # of correctly predicted proteins in SA | 578    | 662      | 490    | 397              | 759        | 779   | 424     |
| PA                                      | 0.64   | 0.69     | 0.73   | 0.78             | 0.60       | 0.68  | 0.57    |
| SA                                      | 0.42   | 0.36     | 0.26   | 0.50             | 0.41       | 0.42  | 0.39    |

\* Numbers in the parentheses indicate total number of proteins for prediction for each category

## Additional file 8.2 – Evaluation of prediction method variants using human BIO set

| PPI sets                                | COMMON | MAJORITY | MERGED | Proteome Analyst | WolfP SORT | CELLO | pTARGET |
|-----------------------------------------|--------|----------|--------|------------------|------------|-------|---------|
| <b>Membrane-membrane PPI only (130)</b> |        |          |        |                  |            |       |         |
| Total # of predicted proteins           | 130    | 130      | 130    | 34               | 130        | 130   | 65      |
| # of correctly predicted proteins in PA | 120    | 120      | 120    | 21               | 70         | 76    | 45      |
| # of correctly predicted proteins in SA | 86     | 81       | 77     | 9                | 49         | 40    | 32      |
| PA                                      | 0.92   | 0.92     | 0.92   | 0.62             | 0.54       | 0.58  | 0.69    |
| SA                                      | 0.66   | 0.62     | 0.59   | 0.26             | 0.38       | 0.31  | 0.49    |
| <b>Soluble-soluble PPI only (607)</b>   |        |          |        |                  |            |       |         |
| Total # of predicted proteins           | 547    | 607      | 607    | 310              | 607        | 607   | 370     |
| # of correctly predicted proteins in PA | 462    | 523      | 529    | 261              | 377        | 456   | 238     |
| # of correctly predicted proteins in SA | 301    | 317      | 290    | 154              | 231        | 278   | 150     |
| PA                                      | 0.84   | 0.86     | 0.87   | 0.84             | 0.62       | 0.75  | 0.64    |
| SA                                      | 0.55   | 0.52     | 0.48   | 0.50             | 0.38       | 0.46  | 0.41    |
| <b>Membrane-soluble PPI only (144)</b>  |        |          |        |                  |            |       |         |
| Total # of predicted proteins           | 135    | 144      | 144    | 41               | 144        | 144   | 66      |
| # of correctly predicted proteins in PA | 46     | 54       | 58     | 32               | 89         | 85    | 43      |
| # of correctly predicted proteins in SA | 26     | 25       | 23     | 22               | 69         | 59    | 32      |
| PA                                      | 0.34   | 0.38     | 0.40   | 0.78             | 0.62       | 0.59  | 0.65    |
| SA                                      | 0.19   | 0.17     | 0.16   | 0.54             | 0.48       | 0.41  | 0.48    |
| <b>Total (881)</b>                      |        |          |        |                  |            |       |         |
| Total # of predicted proteins           | 812    | 881      | 881    | 385              | 881        | 881   | 501     |
| # of correctly predicted proteins in PA | 628    | 697      | 707    | 314              | 536        | 617   | 326     |
| # of correctly predicted proteins in SA | 413    | 423      | 390    | 185              | 349        | 377   | 214     |
| PA                                      | 0.77   | 0.79     | 0.80   | 0.82             | 0.61       | 0.70  | 0.65    |
| SA                                      | 0.51   | 0.48     | 0.44   | 0.48             | 0.40       | 0.43  | 0.43    |

\* Numbers in the parentheses indicate total number of proteins for prediction for each category

### Additional file 8.3 – Evaluation of prediction method variants using human EVI set

| PPI sets                                | COMMON | MAJORITY | MERGED | Proteome Analyst | WolfP SORT | CELLO | pTARGET |
|-----------------------------------------|--------|----------|--------|------------------|------------|-------|---------|
| <b>Membrane-membrane PPI only (73)</b>  |        |          |        |                  |            |       |         |
| Total # of predicted proteins           | 67     | 73       | 73     | 8                | 73         | 73    | 36      |
| # of correctly predicted proteins in PA | 52     | 58       | 59     | 4                | 36         | 44    | 20      |
| # of correctly predicted proteins in SA | 27     | 29       | 25     | 0                | 21         | 21    | 10      |
| PA                                      | 0.78   | 0.79     | 0.81   | 0.50             | 0.49       | 0.60  | 0.56    |
| SA                                      | 0.40   | 0.40     | 0.34   | 0.00             | 0.29       | 0.29  | 0.28    |
| <b>Soluble-soluble PPI only (523)</b>   |        |          |        |                  |            |       |         |
| Total # of predicted proteins           | 457    | 521      | 523    | 265              | 523        | 523   | 316     |
| # of correctly predicted proteins in PA | 364    | 429      | 437    | 220              | 329        | 393   | 197     |
| # of correctly predicted proteins in SA | 218    | 227      | 193    | 137              | 207        | 235   | 118     |
| PA                                      | 0.80   | 0.82     | 0.84   | 0.83             | 0.63       | 0.75  | 0.62    |
| SA                                      | 0.48   | 0.44     | 0.37   | 0.52             | 0.40       | 0.45  | 0.37    |
| <b>Membrane-soluble PPI only (152)</b>  |        |          |        |                  |            |       |         |
| Total # of predicted proteins           | 144    | 151      | 152    | 52               | 152        | 152   | 69      |
| # of correctly predicted proteins in PA | 60     | 67       | 69     | 38               | 90         | 87    | 39      |
| # of correctly predicted proteins in SA | 30     | 30       | 29     | 24               | 63         | 51    | 24      |
| PA                                      | 0.42   | 0.44     | 0.45   | 0.73             | 0.59       | 0.57  | 0.57    |
| SA                                      | 0.21   | 0.20     | 0.19   | 0.46             | 0.41       | 0.34  | 0.35    |
| <b>Total (748)</b>                      |        |          |        |                  |            |       |         |
| Total # of predicted proteins           | 668    | 745      | 748    | 325              | 748        | 748   | 421     |
| # of correctly predicted proteins in PA | 476    | 554      | 565    | 262              | 455        | 524   | 256     |
| # of correctly predicted proteins in SA | 275    | 286      | 247    | 161              | 291        | 307   | 152     |
| PA                                      | 0.71   | 0.74     | 0.76   | 0.81             | 0.61       | 0.70  | 0.61    |
| SA                                      | 0.41   | 0.38     | 0.33   | 0.50             | 0.39       | 0.41  | 0.36    |

\* Numbers in the parentheses indicate total number of proteins for prediction for each category
