# Supplementary material for: Protein-protein interaction as a predictor of subcellular location
Source: PubMed Central journal article supplement (PMC2663780; doi:10.1186/1752-0509-3-28), 2009-02-25
Supplement: 1752-0509-3-28-S9.pdf [file 1752-0509-3-28-S9.pdf]

## Additional file 9 – Evaluation of prediction method variants using LOCSCCL

These 146 PPIs come from the mouse reference set and have additional SCL annotation data available from LOCATE [43]. They were previously evaluated against UniProt GO CC terms (Section 8) but are here evaluated against LOCATE SCL annotations. Where both interaction partners have LOCSCCL data, the randomization process was applied.

| PPI sets  | DISCRETE |      | MERGED |      | COMMON |      | MAJORITY |      |
|-----------|----------|------|--------|------|--------|------|----------|------|
|           | PA       | SA   | PA     | SA   | PA     | SA   | PA       | SA   |
| Reference | 0.79     | 0.38 | 0.89   | 0.42 | 0.87   | 0.48 | 0.85     | 0.45 |
| ALL       | 0.83     | 0.46 | 0.89   | 0.49 | 0.88   | 0.50 | 0.83     | 0.47 |
| BIO       | 0.89     | 0.52 | 0.92   | 0.57 | 0.91   | 0.56 | 0.92     | 0.54 |
| EVI       | 0.59     | 0.41 | 0.83   | 0.53 | 0.82   | 0.58 | 0.78     | 0.50 |
